1  
2  
3  
4  
5  
6  
7  
8  
9  
10  
11  
12  
13  
14  
15  
16  
17  
18  
19  
20  
21  
22  
23  
24  
25  
26  
27  
28  
29  
30  
31

**Multiple RNA regulatory pathways coordinate the activity and expression pattern of a conserved germline RNA-binding protein**

Mennatallah M.Y. Albarqi and Sean P. Ryder\*

University of Massachusetts Medical School, Department of Biochemistry and Molecular Pharmacology, 364 Plantation St, Worcester, MA USA 01605

\*Corresponding author

Mailing address: 364 Plantation Street, LRB-906

Worcester, MA 01605

Phone: 508-856-01605

Email: [sean.ryder@umassmed.edu](mailto:sean.ryder@umassmed.edu)

**Keywords:** *Caenorhabditis elegans*, Germline, RNA-binding proteins, MEX-3, 3'UTR

**Running title:** Spatiotemporal expression of MEX-3 is regulated through its 3'UTR

32 **Abstract**

33 RNA regulation is essential to successful reproduction. Messenger RNAs delivered from  
34 parent to progeny govern early embryonic development. RNA-binding proteins (RBPs)  
35 are the key effectors of this process, controlling the translation and stability of parental  
36 transcripts to control cell fate specification events prior to zygotic gene activation. The  
37 KH-domain RBP MEX-3 is conserved from nematode to human. It was first discovered  
38 in *Caenorhabditis elegans*, where it is essential for anterior cell fate and embryo  
39 viability. Here, we show that *mex-3* mRNA is itself regulated by several RBPs to define  
40 its unique germline spatiotemporal expression pattern. We also show that both poly(A)  
41 tail length control and translational regulation contribute to this expression pattern.  
42 Though the 3'UTR is sufficient to establish the germline expression pattern, we show  
43 that it is not essential for reproduction. An allelic series of 3'UTR deletion variants  
44 identifies repressing regions of the UTR and show that the expression pattern is not  
45 precisely coupled to reproductive health. Together, our results define the pathways that  
46 govern the spatiotemporal regulation of this highly conserved germline RBP and  
47 suggest that redundant mechanisms control MEX-3 function when RNA regulation is  
48 compromised.

49  
50  
51  
52  
53  
54  
55  
56

## 57 **Introduction**

58           Regulation of mRNA metabolism occurs in all cells in all kingdoms of life. In the  
59 nucleus, pre-mRNA undergoes splicing, 5'-capping, and 3'-end cleavage and  
60 polyadenylation (Shatkin & Manley, 2000). Once mature, mRNA is exported to the  
61 cytoplasm where it undergoes further post-transcriptional modifications prior to  
62 translation. In the cytoplasm, mRNA can be stabilized by additional poly-adenylation or  
63 targeted for degradation by exonucleases through deadenylation and de-capping (Coller  
64 & Parker, 2004; Di Giammartino, Nishida, & Manley, 2011). This layer of regulation  
65 contributes to the amount of protein produced per transcript. Failure to properly process  
66 the pre-mRNA in the nucleus or the mature mRNA in the cytoplasm can lead to  
67 dysregulation of protein production and disease. Post-transcriptional regulation is  
68 especially critical in developmental processes such as gametogenesis and  
69 embryogenesis (Salles, Lieberfarb, Wreden, Gergen, & Strickland, 1994; Y. Zhang,  
70 Park, Blaser, & Sheets, 2014). During the early stages of embryogenesis prior to the  
71 onset of zygotic transcription, inherited maternal mRNAs and proteins are critical to axis  
72 formation and cell fate specification (Bashirullah et al., 1999; Tao et al., 2005; J. Zhang  
73 et al., 1998). Maternal mRNAs must be produced in the germline, packaged into  
74 oocytes, silenced, activated at the right time and place in the embryo, and then cleared  
75 once zygotic transcription begins. Accordingly, a variety of post-transcriptional  
76 regulatory mechanisms are required to coordinate this developmental program. Much  
77 remains to be learned about how they collaborate to achieve distinct spatiotemporal  
78 expression patterns for different maternal mRNAs.

79           The germline of the hermaphroditic nematode *Caenorhabditis elegans* is a  
80 suitable model for studying spatiotemporal regulation of maternal mRNA (Hubbard &  
81 Greenstein, 2005; Lee & Schedl, 2006). The gonads consist of two symmetrical tube-  
82 shaped tissues that contain mitotically dividing germ cells in the distal end of each tube  
83 (Fig. 1a). As the mitotic nuclei move away from the distal end, they begin to enter  
84 meiosis I and form a syncytium where the nuclei migrate to the periphery and share  
85 cytoplasmic content. The nuclei recellularize to form oocytes near the loop region as the  
86 tube bends. In the proximal end, oogenesis is followed by fertilization in the  
87 spermatheca where the sperm produced during the L4 larval stage or acquired by  
88 mating is stored. Embryogenesis continues in the uterus, where a hard chitin shell is  
89 secreted (Strome et al., 1994). The 1-cell embryo undergoes multiple pre-ordained  
90 cellular divisions to establish the body axes, segregate germline from soma, and define  
91 the number of tissue lineages before it exits the uterus (Hubbard & Greenstein, 2005).

92           Post-transcriptional regulatory mechanisms contribute to each of these  
93 processes in the germline. For instance, the conserved maxi KH-domain RNA-binding  
94 protein GLD-1 promotes entry into meiosis in part by binding a specific regulatory  
95 element in the 3'UTR of the mitosis-promoting notch receptor *glp-1* and repressing its  
96 translation (Marin & Evans, 2003), the PUF-domain RNA-binding proteins FBF-1/2  
97 promote mitosis in the distal end through 3'UTR-mediated translational repression of  
98 *gld-1* (Suh et al., 2009), and zinc finger RNA-binding proteins OMA-1/2 promote oocyte  
99 maturation in the proximal end through repression of multiple transcripts (Güven-Ozkan,  
100 Robertson, Nishi, & Lin, 2010; Kaymak & Ryder, 2013; Lin, 2003; Spike et al., 2014).

101           The highly conserved KH-domain RNA-binding protein MEX-3 promotes anterior  
102 cell fate specification in the embryo and contributes to maintenance of totipotency in the  
103 germline (Ciosk, DePalma, & Priess, 2006; Draper, Mello, Bowerman, Hardin, & Priess,  
104 1996; Huang & Hunter, 2015). Null mutants of *mex-3* are maternal-effect embryonic  
105 lethal where the embryos fail to hatch due to cell fate patterning defects (Draper et al.,  
106 1996). MEX-3 is evolutionarily conserved across multicellular animals. There are four  
107 human MEX-3 homologues (hMEX-3A-D) (Pereira, Le Borgne, Chartier, Billaud, &  
108 Almeida, 2013). Some of these proteins function in cellular differentiation pathways  
109 (Buchet-Poyau et al., 2007; Pereira, Sousa, et al., 2013). For example, hMEX-3A  
110 regulates intestinal cell fate specification by 3'UTR-mediated negative regulation of the  
111 *cdx2* mRNA, which encodes a homeobox transcriptional factor (Pereira, Sousa, et al.,  
112 2013). hMEX-3A expression is upregulated in gastric cancer (Jiang et al., 2012). The  
113 planarian homologue (*mex3-1*) maintains the pool of mitotic stem cells in addition to  
114 promoting stem cell differentiation (Zhu, Hallows, Currie, Xu, & Pearson, 2015). In the  
115 fish *Nothobranchius furzeri*, *mex3A* contributes to maintenance of proliferating neuronal  
116 stem cells (Naef et al., 2020).

117           *C. elegans* MEX-3 binds two short motifs separated by zero to eight bases  
118 ((A/G/U)(G/U)AGN<sub>(0-8)</sub>U(U/A/C)UA) (Pagano, Farley, Essien, & Ryder, 2009). MEX-3 is  
119 present in the distal mitotic end, maturing oocytes, and the early embryo where it also  
120 associates with P-granules (Draper et al., 1996)--membrane-less structures composed  
121 of RNA and protein. MEX-3 contributes to establishing the anterior/posterior asymmetry  
122 in the 1-cell embryo by repressing *pal-1* mRNA in the anterior blastomere and therefore  
123 restricting it to the posterior blastomere where PAL-1 is necessary for posterior cell fate

124 specification (Huang & Hunter, 2015; Huang, Mootz, Walhout, Vidal, & Hunter, 2002).  
125 MEX-3 also plays a role in maintaining totipotency in the germline; animals carrying null  
126 mutations in both *gld-1* and *mex-3* exhibit signs of transdifferentiation of the germ cells  
127 to neuronal or pharyngeal cells (Ciosk et al., 2006). Although we know some of the  
128 downstream target mRNAs of MEX-3, we do not know how *mex-3* mRNA itself is  
129 regulated. We previously discovered that the *mex-3* 3'UTR is sufficient to confer the  
130 MEX-3 pattern of expression to a reporter gene. Transgenic animals carrying a reporter  
131 transgene driven by a pan-germline promoter fused to GFP and the 3'UTR of *mex-3*  
132 (*(Pmex-5::MODC PEST::GFP::H2B:: mex-3 3'UTR)*, MODC: Mouse Ornithine  
133 DeCarboxylase) exhibit an expression pattern that is similar to that of the endogenous  
134 MEX-3 (Kaymak et al., 2016) (Fig. 1). Additionally, the 3'UTR of *mex-3* contains putative  
135 binding motifs for several germline RBPs such as GLD-1, LIN-41, and OMA-1/2, but it  
136 remains unknown whether these binding motifs are functional and if they contribute to  
137 the spatiotemporal localization of MEX-3 and animal fertility.

138         In this study, we demonstrate that *mex-3* mRNA is indeed post-transcriptionally  
139 regulated. We identify the RNA-binding proteins that control its germline spatiotemporal  
140 expression through its 3'UTR, as well as the regulatory mechanisms involved. We find  
141 that different mechanisms govern the expression pattern of MEX-3 in different regions of  
142 the germline, leading to its differential abundance across the gonad. We also show that  
143 the 3'UTR of *mex-3* is surprisingly dispensable for fertility but does contribute to animal  
144 fecundity. Overall, our data define a model for how MEX-3 is patterned and demonstrate  
145 that the primary role of its 3'UTR is to enhance reproductive robustness.

146

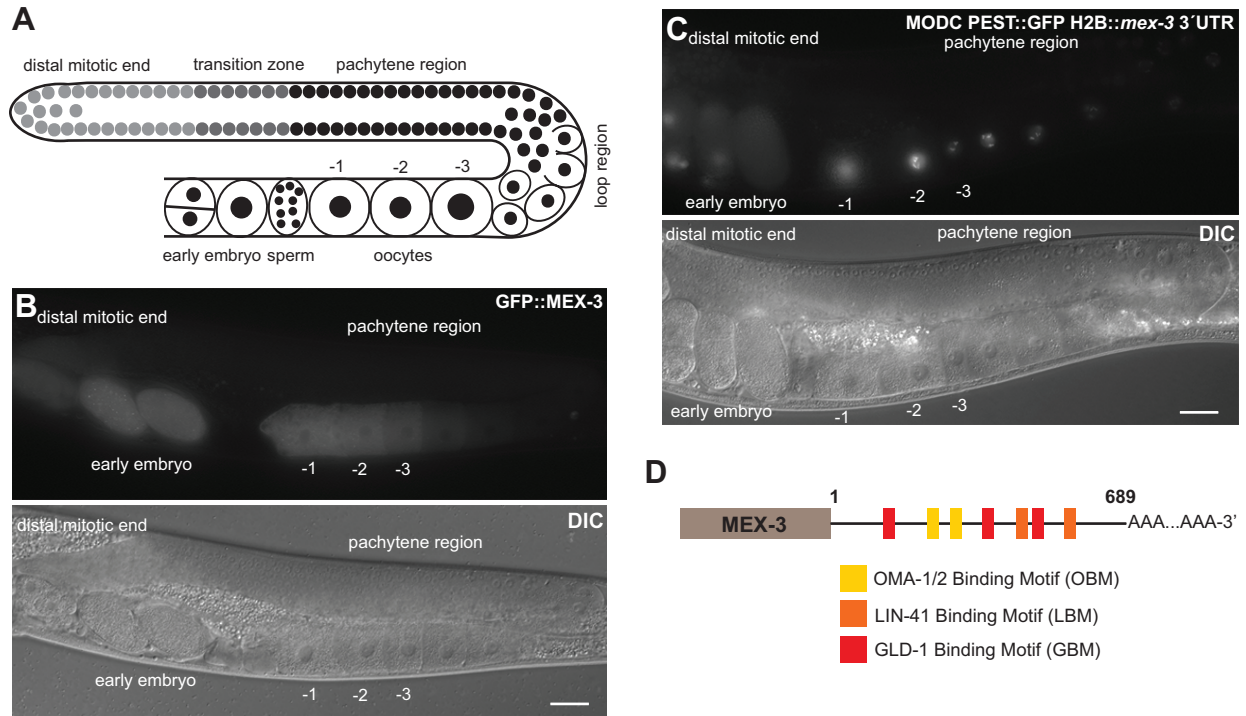

147

148 **Figure 1. MEX-3 exhibits a unique expression pattern in the germline. (A)** A  
 149 schematic representing germline organization in *C. elegans*. One of two gonadal arms  
 150 is shown. Germ cells undergo mitotic divisions in the distal end and then enter meiosis  
 151 as they move farther from the distal tip cell. The syncytial meiotic nuclei start to  
 152 recellularize around the loop region to form oocytes. In the proximal end, late oocytes  
 153 undergo maturation, get fertilized by the sperm, and then move to the uterus to undergo  
 154 embryonic development. **(B)** DIC and fluorescence images of an adult hermaphrodite  
 155 germline from the strain in which MEX-3 is endogenously tagged with GFP (GFP::MEX-  
 156 3). MEX-3 is present in the distal mitotic end, maturing oocytes, and early embryo. **(C)**  
 157 DIC and fluorescence images of an adult hermaphrodite germline from the transgenic  
 158 reporter strain carrying a germline promoter fused to GFP and the *mex-3* 3'UTR. MEX-3  
 159 is present in the distal mitotic end, maturing oocytes, and early embryo. **(D)** A schematic  
 160 representing the 3'UTR of *mex-3* and some of its putative binding motifs. Images taken  
 161 at 40x magnification. Scale bars = 30µm.

162

163

164

165

166

167

168 **Results**

169 **DAZ-1, GLD-1, LIN-41, and OMA-1/2 regulate MEX-3 expression in the germline**

170 MEX-3 exhibits a unique expression pattern (Fig.1b). In wild type animals, MEX-3  
171 is expressed at low levels in the distal mitotic progenitor cells and is absent in the  
172 syncytial meiotic region of the germline. MEX-3 is also expressed in early immature  
173 oocytes with its overall abundance progressively increasing as the oocytes approach  
174 maturation (Fig. 1b). Transcripts encoding *mex-3* have a long 3'UTR (689bp) that  
175 contains putative binding motifs for several germline RBPs (Fig. 1d). We previously  
176 demonstrated that this 3'UTR is sufficient to confer the MEX-3 pattern of expression to  
177 a reporter gene in live animals (Fig. 1c) (Kaymak et al., 2016). Thus, we predicted that  
178 the germline RBPs that associate with these motifs might coordinate MEX-3 expression  
179 through its 3'UTR via post-transcriptional regulatory mechanisms.

180 To test this hypothesis, we performed an RBP-targeted RNAi screen using a  
181 strain in which wild type MEX-3 is endogenously tagged with GFP (GFP::MEX-3)  
182 (Tsukamoto et al., 2017). We soaked L4 or arrested L1 larval stage animals in dsRNA  
183 corresponding to the coding sequence of the candidate RBP. Then, we placed the  
184 animals on *E. coli* OP50 as a food source and imaged the adults using fluorescence  
185 microscopy to assess the effect of the RNAi on the germline GFP::MEX-3 expression  
186 pattern. We found that knockdown of *daz-1*, *gld-1*, *lin-41*, or *oma-1/2* significantly  
187 altered the pattern of wild type GFP::MEX-3 expression (Fig. 2, Table S4). Knockdown  
188 of *daz-1* resulted in an overall increase of GFP::MEX-3 in the distal mitotic region (Fig.  
189 2b, 2f, Table S4), but had no impact on the syncytial meiotic pachytene region.



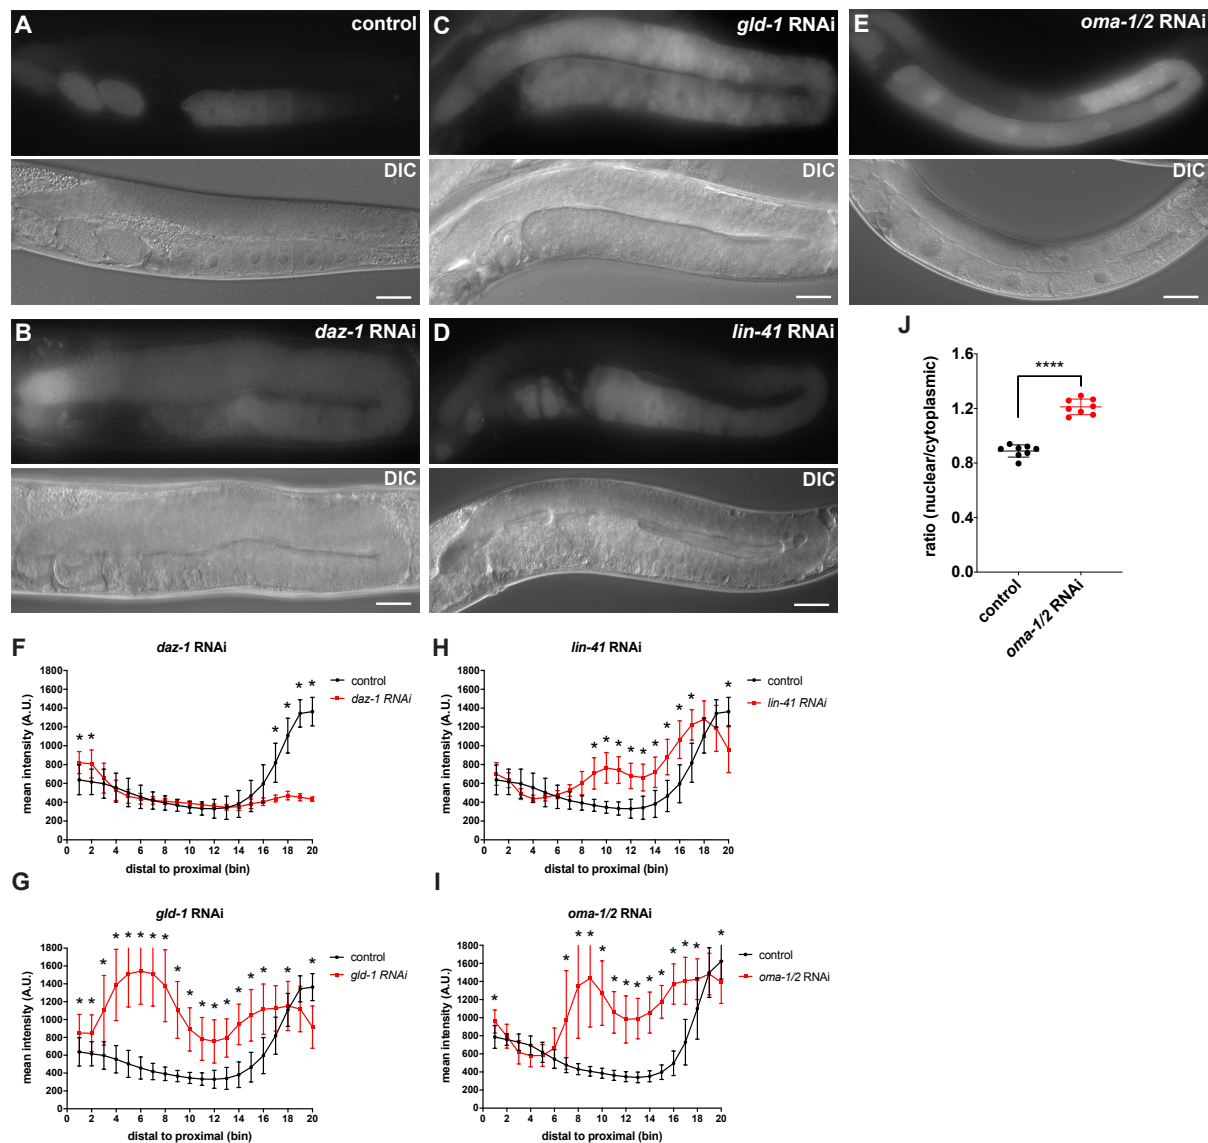

190

191 **Figure 2. DAZ-1, GLD-1, OMA-1/2, and LIN-41 regulate spatiotemporal expression**  
 192 **pattern of MEX-3 in the germline. (A)** DIC and fluorescence images of wild type  
 193 GFP::MEX-3 animals from the control RNAi. **(B)** DIC and fluorescence images of  
 194 GFP::MEX-3 animals after *daz-1* knockdown. GFP::MEX-3 was significantly increased  
 195 in the mitotic distal end. **(C)** DIC and fluorescence images of GFP::MEX-3 animals after  
 196 *gld-1* knockdown. GFP::MEX-3 expression was derepressed in the meiotic region. **(D)**  
 197 DIC and fluorescence images of GFP::MEX-3 animals after *lin-41* knockdown.  
 198 GFP::MEX-3 was de-repressed in the loop region. **(E)** DIC and fluorescence images of  
 199 GFP::MEX-3 animals after *oma-1/2* knockdown. GFP-MEX-3 was significantly  
 200 increased in the oocytes. **(F)** quantitative analysis of fluorescence intensity after *daz-1*  
 201 knockdown (n=9/15). For all the images from the RNAi, a line with a width of 30 pixels  
 202 was drawn along the entire germline and fluorescence intensities were binned (20 bins).  
 203 Data are shown as the mean fluorescence intensity  $\pm$  standard deviation (SD). A two

204 tailed student t-test was performed to compare the means for each bin from control  
205 animals and the RNAi condition to assess significance. For RNAi conditions that have  
206 the same control, a one-way unstacked ANOVA was used to assess the overall  
207 significance, then Bonferroni adjusted p-values were calculated by multiplying pairwise  
208 Fisher's LSD test p-values by the number of hypotheses tested. All p-values for this  
209 figure are reported in table S4. **(G)** quantitative analysis of fluorescence intensity after  
210 *gld-1* knockdown (n=7/13). **(H)** quantitative analysis of fluorescence intensity after *lin-41*  
211 knockdown (n=17/17). **(I)** quantitative analysis of fluorescence intensity after *oma-1/2*  
212 knockdown (n=9/9). **(J)** quantitative analysis of nuclear GFP::MEX-3 of the *oma-1/2*  
213 RNAi animals. Nuclear fluorescence intensity was divided by the cytoplasmic  
214 fluorescence intensity for each oocyte. Each dot represents the averaged ratios from  
215 the two most proximal oocytes in an individual animal. (\*) indicates statistical  
216 significance, adjusted p-value  $\leq 0.05$ . (\*\*\*\*) indicates statistical significance, p-value  $\leq$   
217 0.0005. Scale bar = 30  $\mu\text{m}$ .  
218

219 Knockdown of *daz-1* also resulted in defective oogenesis, so the impact on  
220 GFP::MEX-3 in the oocytes could not be directly assessed but appeared reduced in the  
221 quantitation due to the absence of oocytes. Knockdown of *gld-1* resulted in increased  
222 expression of GFP::MEX-3 in the distal mitotic end as well as expansion of GFP::MEX-3  
223 to the meiotic region (Fig. 2c, 2g, Table S4). These results confirm a previous finding  
224 using anti-MEX-3 antibody staining after *gld-1* RNAi (Mootz, Ho, & Hunter, 2004).  
225 Knockdown of *lin-41* resulted in expansion of GFP::MEX-3 to the loop region (Fig. 2d,  
226 2h, Table S4), while knockdown of *oma-1/2* caused an increase in GFP::MEX-3  
227 expression in the oocytes, also confirming prior observations (Tsukamoto et al., 2017).  
228 We also note that knockdown of *oma-1/2* led to accumulation of GFP::MEX-3 in the  
229 nucleus (Fig. 2e, 2i, 2j, Table S4). By contrast, knockdown of *pos-1* or *pie-1* had no  
230 effect on the pattern of expression. Together, our data identify DAZ-1 as a regulator of  
231 GFP::MEX-3 expression in the distal mitotic end and confirm that GLD-1, LIN-41, and  
232 OMA-1/2 regulate GFP::MEX-3 expression in the pachytene region, the loop region,  
233 and in late oocytes, respectively.

234 To determine whether the RBPs identified above regulate *mex-3* expression  
235 through its 3'UTR, we knocked down *daz-1*, *gld-1*, *lin-41*, or *oma-1/2* in the transgenic  
236 reporter strain described above where a pan-germline promoter (*Pmex-5*) drives the  
237 expression of a nuclear MODC PEST::GFP::H2B reporter under the control of the *mex-3*  
238 3'UTR. Knockdown of *gld-1*, *lin-41*, or *oma-1/2* changed the pattern of reporter  
239 expression similarly to knockdown of endogenous GFP::MEX-3 (Fig. S1, Table S7),  
240 suggesting that these RBPs act through the *mex-3* 3'UTR. By contrast, knockdown of  
241 *daz-1* did not show a strong increase of reporter expression in the distal mitotic end,  
242 suggesting that this protein alters MEX-3 expression via a 3'UTR-independent  
243 mechanism, possibly through the coding sequence, the 5' end, or indirectly through  
244 dysregulation of factors that act on the *mex-3* promoter.

245

246 **Poly(A) tail length control mediates the spatiotemporal expression pattern of**  
247 **MEX-3.**

248 The length of the poly-adenosine tail contributes to the stability and translational  
249 efficiency of eukaryotic mRNAs and has been demonstrated to control post-  
250 transcriptional regulation of maternal mRNAs in several metazoans including *C. elegans*  
251 (Lima et al., 2017; Nusch, Yeroslaviz, Habermann, & Eckmann, 2014; Salles et al.,  
252 1994). To test whether cytoplasmic polyadenylation contributes to the pattern of MEX-3  
253 expression, we used RNAi to knock down components of the germline cytoplasmic  
254 poly(A) polymerase complexes (*gld-2*, *gld-4*, *gld-3*, *rnp-8*) in the wild type GFP::MEX-3  
255 strain (Fig. 3, Table S5). Knockdown of *gld-2* resulted in reduced GFP::MEX-3  
256 expression in the transition zone/early meiotic region and the immature oocytes

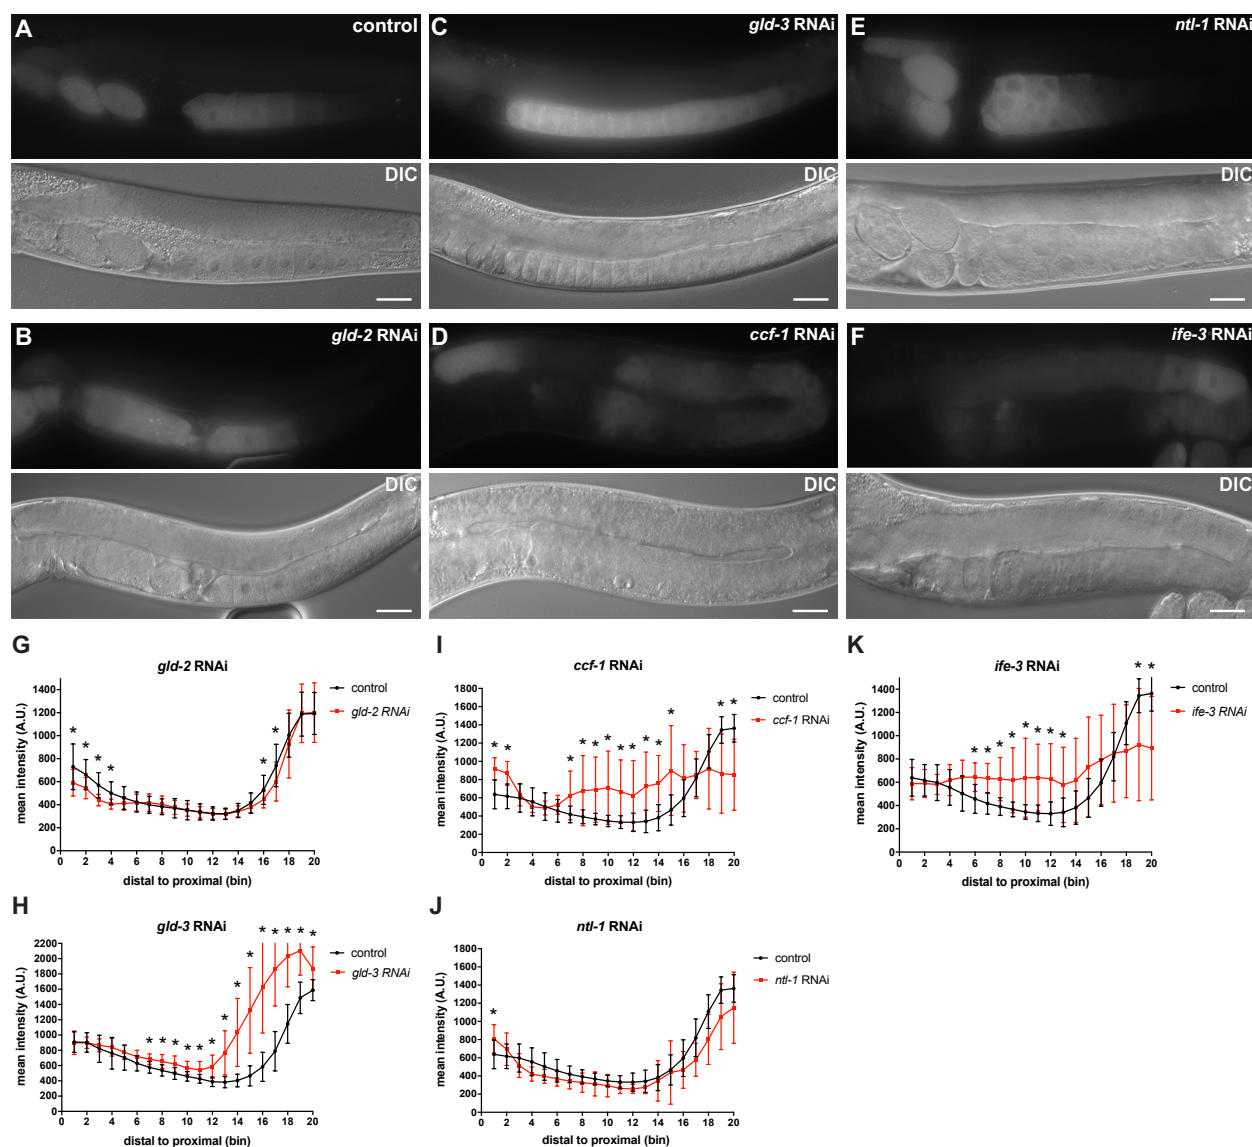

257

258 **Figure 3. Poly(A) tail length control and translational regulation contribute to**  
 259 **post-transcriptional regulation of *mex-3* in the germline. (A)** DIC and fluorescence  
 260 images of wild type GFP::*MEX-3* animals from the control RNAi. **(B)** DIC and  
 261 fluorescence images after *gld-2* knockdown. GFP::*MEX-3* was significantly reduced in  
 262 the distal mitotic end and oocytes. **(C)** DIC and fluorescence images after *gld-3*  
 263 knockdown. GFP::*MEX-3* expression was significantly increased in the oogenic region.  
 264 **(D)** DIC and fluorescence images after *ccf-1* knockdown. GFP::*MEX-3* expression was  
 265 significantly increased in the distal mitotic end and the meiotic region. **(E)** DIC and  
 266 fluorescence images after *ntl-1* knockdown. GFP::*MEX-3* expression was significantly  
 267 increased in the distal mitotic end. **(F)** DIC and fluorescence images after *ife-3*  
 268 knockdown. GFP::*MEX-3* expression was significantly increased in the distal end and  
 269 meiotic region. **(G)** quantitative analysis of fluorescence intensity after *gld-2* knockdown  
 270 (n=15/15). **(H)** quantitative analysis of fluorescence intensity after *gld-3* knockdown  
 271 (n=7/12). **(I)** quantitative analysis of fluorescence intensity after *ccf-1* knockdown  
 272 (n=15/15). **(J)** quantitative analysis of fluorescence intensity after *ntl-1* knockdown

273 (n=13/13). **(K)** quantitative analysis of fluorescence intensity after *ife-3* knockdown  
274 (n=13/13). (\*) indicates statistical significance, adjusted p-value  $\leq 0.05$ . All p-values for  
275 this figure are reported in table S5. Scale bar = 30  $\mu\text{m}$ .  
276

277 (Fig. 3b, 3g, Table S5). Since GLD-2 does not contain an RNA-binding domain, it  
278 requires an RBP co-factor such as GLD-3 or RNP-8 to direct it to specific germline  
279 transcripts (Eckmann, Crittenden, Suh, & Kimble, 2004). Knockdown of *gld-3* resulted in  
280 increased GFP::MEX-3 expression throughout the oogenic region (Fig. 3c, 3h, Table  
281 S5). In treated animals, GFP::MEX-3 also accumulated in punctate-like formations  
282 surrounding the nucleus and near the plasma membrane. GLD-3 promotes  
283 spermatogenesis in the sex-determination pathway (Eckmann, Kraemer, Wickens, &  
284 Kimble, 2002). Thus, knockdown of *gld-3* results in spermatogenesis defects, causing  
285 oocytes to stack in the proximal germline and expand to the loop (Fig. 3c, 3h). As such,  
286 the enhanced GFP::MEX-3 fluorescence could be the result of an accumulation of  
287 mature oocytes. It could also be that GLD-3, independently of GLD-2, represses MEX-3  
288 through an unknown pathway. Neither knockdown of *gld-4* nor *rnp-8* changed the  
289 expression of GFP::MEX-3. Together, these data suggest that GLD-2 and GLD-3 play a  
290 role in regulating wild type GFP::MEX-3 expression in the germline, but given their  
291 differential effect, it is likely that they do not act in the same way.

292 In *C. elegans*, the major deadenylation complex consists of the subunits CCF-1,  
293 CCR-4, and NTL-1. To assess the role of cytoplasmic deadenylation in repressing  
294 GFP::MEX-3, we knocked down these components using RNAi. Knockdown of either  
295 *ccf-1* or *ntl-1* altered the expression pattern of GFP::MEX-3 (Fig. 3d-3e, 3i-3j, Table S5).  
296 Knockdown of *ccf-1* causes meiotic defects that lead to formation of small cellularized  
297 nuclei that look like oocytes but the nuclei are arrested in pachytene (Molin & Puisieux,

298 2005). Knockdown of *ccf-1* resulted in increased expression in the mitotic region,  
299 expansion to early meiotic zone, and ectopic expression in the oocytes where some  
300 defective oocytes appeared to have varying levels of GFP::MEX-3 (Fig. 3d, 3i, Table  
301 S5). Knockdown of *ntl-1* causes defects in meiotic progression, preventing formation of  
302 normal oocytes and leading to defects in germline organization where small defective  
303 oocytes appear in multiple layers in the proximal end. Knockdown of *ntl-1* resulted in  
304 increased expression of GFP::MEX-3 in the mitotic region (Fig. 3e, 3j, Table S5).  
305 Knockdown of *ccr-4* did not alter the GFP::MEX-3 expression suggesting that CCR-4  
306 alone is not essential for regulating MEX-3 expression or that it is not a key component  
307 of the deadenylation complex that regulates MEX-3 expression. Together, these results  
308 show that components of the cytoplasmic polyadenylation machinery positively regulate  
309 MEX-3 expression in the mitotic and oogenic regions, while components of the  
310 deadenylation machinery repress GFP::MEX-3 expression in the mitotic, meiotic, and  
311 oogenic regions. We propose that differential activity of each pathway, in different  
312 regions of the germline, coordinates the overall pattern of endogenous MEX-3  
313 expression.

314

### 315 **The translation initiation factor IFE-3 represses the expression of MEX-3 in the** 316 **mitotic and meiotic regions**

317 Among the five *C. elegans* translation initiation factor eIF4E homologs, only *ife-3*  
318 causes embryonic lethality when knocked down (Keiper et al., 2000). A recent report  
319 revealed that this factor negatively regulates the translation of specific maternal  
320 transcripts in the germline, presumably by interfering with normal translation initiation

321 mediated by the other homologs (Huggins et al., 2020). To test whether *ife-3* contributes  
322 to the pattern of MEX-3 expression, we knocked it down via RNAi in the wild type  
323 GFP::MEX-3 strain. Knockdown of *ife-3* caused defects in late stages of meiosis leading  
324 to the failure to form oocytes (Fig. 3f, 3k, Table S5). In addition, we observed an  
325 increase of GFP::MEX-3 levels in the meiotic region. These results suggest that IFE-3  
326 may be involved in mechanisms that regulate translation and expression of MEX-3 in  
327 the meiotic region.

328

### 329 **The 3'UTR of *mex-3* is required for the spatiotemporal expression of MEX-3**

330 The 3'UTR of *mex-3* contains putative binding motifs for several germline RNA-  
331 binding proteins, including those that we and others have shown contribute to its pattern  
332 of expression above (Fig. 1d, Fig. 2). To investigate whether these binding motifs  
333 contribute to the pattern of MEX-3 expression pattern, we used CRISPR/Cas9 to make  
334 an allelic series of *mex-3* 3'UTR deletion mutants in the wild type GFP::MEX-3  
335 background (Fig. 4a), enabling observation of changes in the expression pattern of  
336 GFP::MEX-3 in addition to scoring the resulting phenotypes. We generated three small  
337 deletions (*spr6*: 142bp, *spr10*: 190bp, *spr7*: 134bp) and two larger deletions (*spr5*:  
338 488bp, *spr9*: 624bp) in this series (Fig. 4a). All mutants were made in the wild type  
339 GFP::MEX-3 background except *mex-3(spr5)*. *mex-3(spr5)* was made in a background  
340 strain in which wild type MEX-3 is not tagged with GFP. Among the four mutants made  
341 in the GFP::MEX-3 background, only *mex-3(spr9)* and *mex-3(spr10)* mutant animals  
342 exhibited altered expression pattern. *mex-3(spr9)* mutant animals exhibited a significant  
343 increase in GFP::MEX-3 expression throughout the germline, especially in the meiotic

344 and loop regions (Fig. 4b, 4c, Table S6). *mex-3(spr10)* mutant animals showed a  
 345 modest increase of GFP::MEX-3 in the loop region (Fig. 4d, 4e, Table S6).

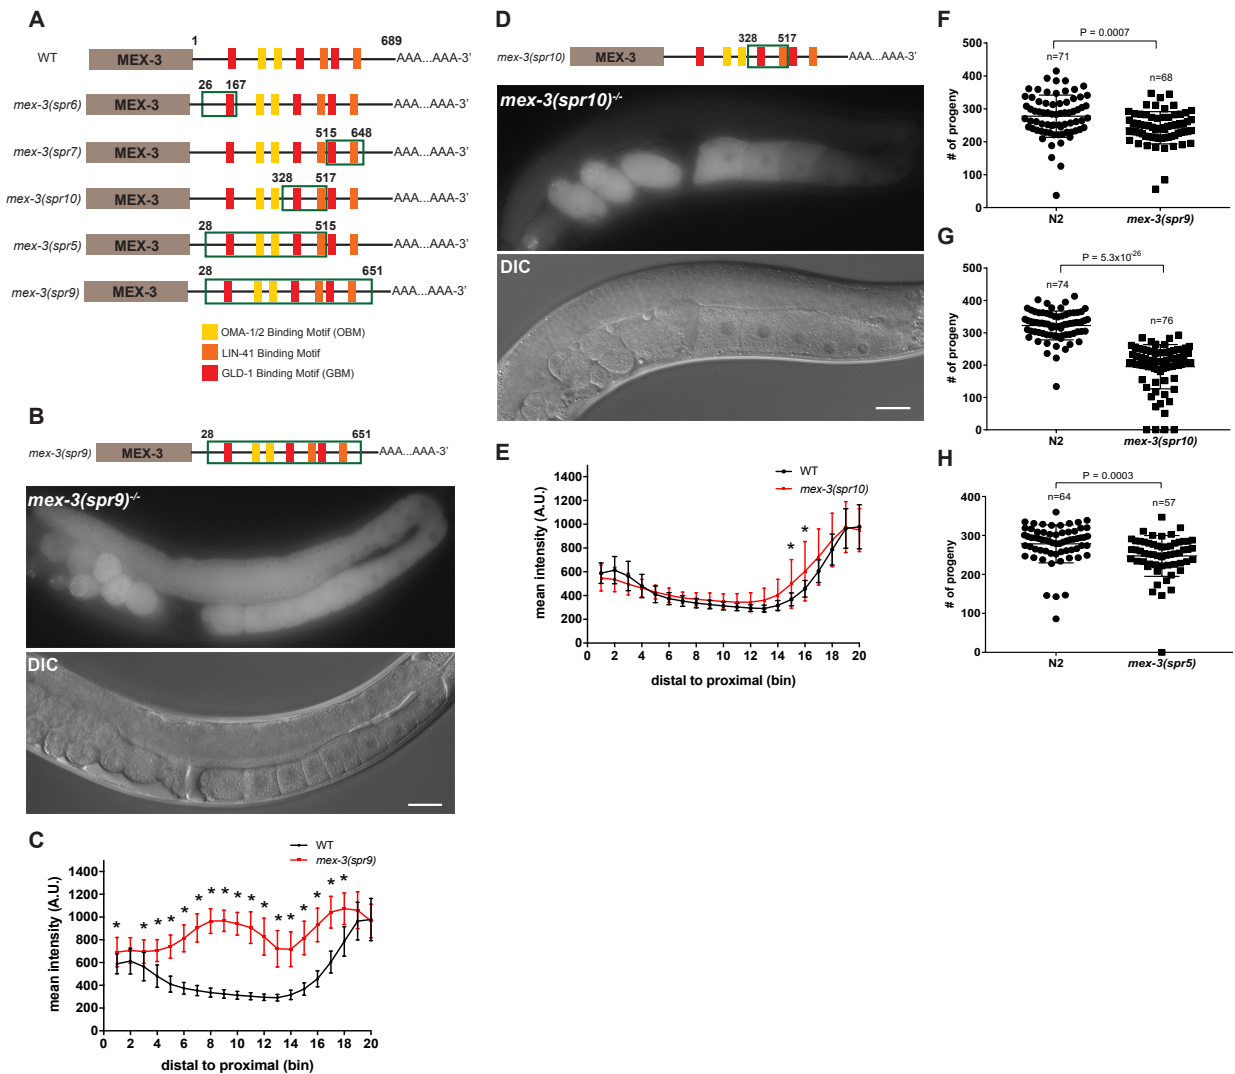

346

347 **Figure 4. *mex-3* 3'UTR deletions alter MEX-3 expression and reduce fertility. (A)** A  
 348 schematic representing the 3'UTR deletions made in the wild type GFP::MEX-3 strain.  
 349 The region deleted in each mutant is highlighted by the green rectangle. **(B)** DIC and  
 350 fluorescence images of the germline of the *mex-3(spr9)* homozygous mutant animals.  
 351 **(C)** quantitative analysis of the fluorescence intensity in the *mex-3(spr9)* mutant animals  
 352 compared to that of wild type GFP::MEX-3 (n=23). **(D)** DIC and fluorescence images of  
 353 the germline of the *mex-3(spr10)* homozygous mutant animals. **(E)** quantitative analysis  
 354 of the fluorescence intensity in the *mex-3(spr10)* mutant animals compared to that of  
 355 wild type GFP::MEX-3 (n=17). **(F)** brood size assay of *mex-3(spr9)* mutant animals at  
 356 20°C. Each dot represents the brood size of an individual animal. Data from three  
 357 biological replicates are shown in the graph. P-values are from a Kolmogorov-Smirnov



358 test. **(G)** brood size assay of *mex-3(spr10)* mutant animals at 20°C. **(H)** brood size  
359 assay of *mex-3(spr5)* mutant animals at 20°C. All p-values for panels C and E are  
360 reported in table S6. All images taken at 40x magnification. Scale bar = 30 µm.  
361

362 The altered expression pattern of GFP::MEX-3 throughout the germline caused by  
363 deleting majority of the 3'UTR (*spr9*) indicates that the 3'UTR contains various cis-  
364 regulatory elements that coordinate GFP::MEX-3 expression through multiple  
365 mechanisms in different regions of the germline. The de-repression of GFP::MEX-3  
366 observed in the loop region in the *mex-3(spr10)* mutant animals indicates that the  
367 deletion in this mutant may contain repressive elements that mediate repression of *mex-*  
368 *3* in that region. To assess whether any of the 3'UTR deletions disrupt poly(A)  
369 processing leading to aberrant 3'-end formation, we used a poly(A) tail-driven approach  
370 to amplify and sequence the 3'-end of *mex-3* transcripts produced by each mutant.  
371 None of the deletions affected the poly(A) processing site selection. All mutants use the  
372 most common poly(A) processing site found in endogenous *mex-3* (Table S8).

373

### 374 **The 3'UTR of *mex-3* is not required for viability but contributes to animal** 375 **fecundity**

376 All five mutants including the *spr9* allele that deletes majority of the 3'UTR  
377 (624bp) are viable as homozygotes and can be easily propagated as such. This  
378 demonstrates that the 3'UTR, though sufficient to pattern reporter expression, is not  
379 essential for viability. To determine if any of the mutations compromise reproductive  
380 health, we measured the brood size in animals homozygous for the deletions compared  
381 to control wild type animals. Three of the five deletion mutants exhibited reduced fertility.

382 Brood size was reduced in *mex-3(spr9)* (Fig. 4f, p-value = 0.0007), *mex-3(spr10)* (Fig.  
383 4g, p-value =  $5.3 \times 10^{-26}$ ), and *mex-3(spr5)* (Fig. 4h, p-value = 0.0003).

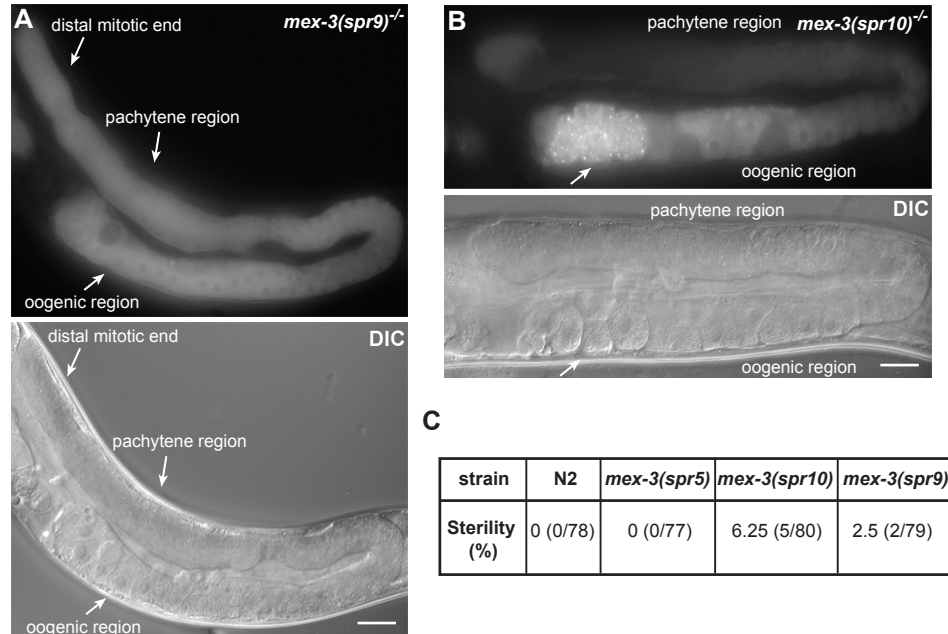

384

385 **Figure 5. *mex-3(spr9)* and *mex-3(spr10)* mutant animals exhibit partial sterility.**  
386 (A) a representative image of a sterile *mex-3(spr9)* homozygous mutant animal at 25°C.  
387 The animals fail to produce normal oocytes or viable embryos. Oogenesis appears to be  
388 defective. (B) a representative image of a sterile *mex-3(spr10)* homozygous mutant  
389 animal at 25°C. The animals contain smaller than normal defective oocytes. GFP::*MEX-*  
390 3 appears to accumulate in granules. (C) a table showing the percentage of sterile  
391 animals in each mutant population as well as the wild type animals. Each adult was  
392 grown at 25°C and its progeny scored for fertility/sterility. All images taken at 40x  
393 magnification. Scale bar = 30 μm.

394

395 Moreover, *mex-3(spr9)* and *mex-3(spr10)* mutant animals exhibited partial  
396 sterility at 25°C (Fig. 5). 2.5% of homozygous *mex-3(spr9)* mutant animals were sterile  
397 while 6.25% of the homozygous *mex-3(spr10)* mutant animals were sterile (Fig. 5C).  
398 Sterile animals from both strains exhibited a GFP::*MEX-3* expression pattern similar to  
399 that of the non-sterile homozygous mutant animals. However, sterile animals from both  
400 strains exhibited defects in oogenesis (Fig. 5a-5b). The gonads did not contain normal

401 oocytes or viable embryos. The reduction in brood size, partial sterility, and germline  
402 defects in the sterile animals indicate that the 3'UTR of *mex-3* contributes to animal  
403 fecundity through ensuring normal gametogenesis.

404

## 405 **Discussion**

### 406 **DAZ-1 regulation of MEX-3 expression in the mitotic progenitor cells**

407 The 3'UTR of maternal germline mRNAs contain binding motifs for numerous  
408 germline RNA-binding proteins (Aeschimann et al., 2017; Farley, Pagano, & Ryder,  
409 2008; Kaymak & Ryder, 2013; Ryder, Frater, Abramovitz, Goodwin, & Williamson, 2004;  
410 Tamburino, Ryder, & Walhout, 2013). However, we don't know which of the predicted  
411 motifs are functional and whether these 3'UTRs are required for germline development.  
412 Here, we dissected the 3'UTR of the *mex-3* gene, which encodes an RNA-binding  
413 protein required for embryonic cell fate patterning and totipotency in the germline.  
414 MEX-3 is expressed in the distal mitotic end, maturing oocytes, and the early embryo  
415 (Draper et al., 1996; Tsukamoto et al., 2017) (Fig. 1b, 1c). Additionally, the 3'UTR of  
416 *mex-3* contains putative binding motifs for several germline RNA-binding proteins (Fig.  
417 1d). Our candidate RBP RNAi screen revealed that knockdown of *daz-1*, *gld-1*, *lin-41*, or  
418 *oma-1/2* altered GFP-tagged endogenous MEX-3 (GFP::MEX-3) expression in differing  
419 region in the germline (Fig. 2)

420 DAZ-1, an RNA-binding protein that contains an RRM (RNA Recognition Motif)  
421 and contributes to meiotic progression during oocyte development (Karashima,  
422 Sugimoto, & Yamamoto, 2000), appears to regulate the expression pattern of MEX-3 in

423 the mitotic region. Although MEX-3 is expressed in that region in wild type animals,  
 424 knockdown of *daz-1* caused a significant increase of GFP::*MEX-3* expression

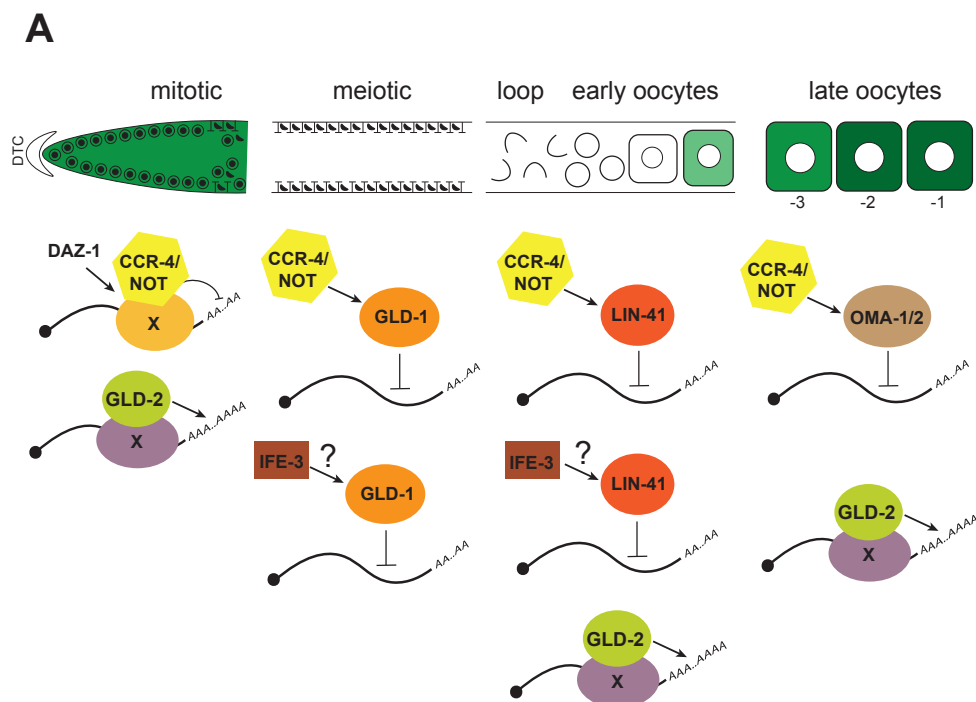

425  
 426 **Figure 6. Model for 3'UTR-mediated post-transcriptional regulation of *mex-3* in the**  
 427 **germline. (A)** DAZ-1 indirectly regulates expression of MEX-3 in the distal mitotic end.  
 428 GLD-1 represses MEX-3 expression through its 3'UTR in the meiotic region. LIN-41  
 429 represses expression of MEX-3 in the loop region while OMA-1/2 repress expression of  
 430 MEX-3 in the maturing oocytes. Cytoplasmic polyadenylation positively regulates  
 431 expression of MEX-3 in the distal mitotic end and oocytes while cytoplasmic  
 432 deadenylation negatively regulates expression of MEX-3 throughout the entire germline.  
 433 IFE-3 negatively regulates expression of MEX-3 in the meiotic and loop regions.  
 434

435 in the distal mitotic end (Fig. 2b, 2f, Table S4), suggesting that DAZ-1 represses *mex-3*  
 436 in that region. The binding specificity of DAZ-1 is unknown. Therefore, we don't know if  
 437 the 3'UTR of *mex-3* contains binding motifs for DAZ-1. However, knockdown of *daz-1* in  
 438 the *mex-3* 3'UTR reporter strain did not show similar results in the distal mitotic end  
 439 (Fig. S1). Therefore, DAZ-1 likely does not regulate *mex-3* expression through its

440 3'UTR. Interestingly, GFP::MEX-3 was significantly increased in the *mex-3(spr9)* mutant  
441 animals in the distal mitotic end (Fig. 4b, 4c, Table S6) indicating that the 3'UTR  
442 contains cis-regulatory elements that negatively regulate its expression in the mitotic  
443 progenitor cells. Although DAZ-1 may not regulate MEX-3 expression through its  
444 3'UTR, it is possible that it may regulate the expression of other pathways that directly  
445 influence *mex-3* expression (Fig. 6a). The increased MEX-3 expression in the distal  
446 mitotic end as a result of knockdown of the deadenylation complex components *ccf-1* or  
447 *ntl-1* is consistent with this possibility. The presence of a mechanism to repress MEX-3  
448 expression in the distal mitotic end suggests that overexpression of MEX-3 in the distal  
449 end may negatively impact mitotically dividing germ cells, in certain contexts. MEX-3  
450 has been shown to contribute to maintenance of totipotency by repressing *pal-1*, which  
451 promotes development of body muscles (Ciosk et al., 2006). Precisely how DAZ-1  
452 contributes to this pattern, and whether it works through cytoplasmic deadenylation, is  
453 still unknown.

454

#### 455 **GLD-1-mediated repression of endogenous MEX-3 expression in the meiotic** 456 **region**

457 Our results are consistent with and expand upon a previous study that showed  
458 GLD-1 represses *mex-3* expression in the germline (Mootz et al., 2004). The 3'UTR of  
459 *mex-3* also contains three putative GLD-1 binding motifs (GBMs) (Ryder et al., 2004;  
460 Wright et al., 2011). Consistent with previous findings, our results reveal that *gld-1*  
461 knockdown leads to de-repression of the endogenous GFP::MEX-3 in the meiotic region  
462 (Fig. 2c, 2g, Table S4). The observation of a similar result in the *mex-3* 3'UTR reporter

463 transgenic strain (Fig. S1, Table S7) indicates that this repression acts through the  
464 3'UTR. Among the 3'UTR deletion mutants, the *mex-3(spr7)* deletion removes a single  
465 GBM but displays no altered expression in the meiotic region (Fig. S2, Table S6). The  
466 same is also true in the *mex-3(spr6)* mutant animals, where the deletion removes a  
467 different GBM (Fig. S2, Table S6) and *mex-3(spr10)* mutant animals where the 3'UTR  
468 deletion removes the third GBM (Fig. 4d, 4e, Table S6). These results indicate that loss  
469 of any one of the three putative GBMs is not sufficient to de-repress *mex-3* expression  
470 on its own. However, *mex-3(spr9)* mutant animals in which all three GBMs are deleted  
471 show complete de-repression of MEX-3 in the meiotic region (Fig. 4b, 4c, Table S6). It is  
472 also possible that other RBPs contribute to the 3'UTR-mediated repression of *mex-3* in  
473 the meiotic region. The deletion in the *mex-3(spr5)* mutant animals removes two GBMs,  
474 but we do not know how the deletion impacts the expression of endogenous MEX-3.  
475 GLD-1 may repress *mex-3* expression by binding the deadenylation complex and  
476 promoting deadenylation of *mex-3* mRNA reducing its stability and leading to its  
477 degradation. GLD-1 may also repress *mex-3* expression by inhibiting its translation (Lee  
478 & Schedl, 2004). Consistent with this hypothesis, knockdown of deadenylation  
479 components *ccf-1* and *ntl-1*, or knockdown of the translational repressor *ife-3*, partially  
480 phenocopies the *spr9* mutant where all three GBMs are deleted (Fig. 3d-3f, Fig. 4b).  
481 Taken together, our findings support a model where GLD-1 represses *mex-3* translation  
482 directly through its 3'UTR (Fig. 6a), and that multiple binding motifs can contribute to  
483 repression.

484

485

486 **LIN-41-mediated repression of endogenous MEX-3 expression in the loop region**

487 LIN-41 is expressed in the loop region, where meiotic nuclei start to recellularize,  
488 and in early immature oocytes (Tsukamoto et al., 2017). The 3'UTR of *mex-3* contains  
489 two putative LIN-41 binding motifs (LBM). GFP::MEX-3 expression was previously  
490 shown to expand to the loop region in a *lin-41* null mutant background (Tsukamoto et  
491 al., 2017). Consistent with these findings, we observed expansion of GFP::MEX-3 to the  
492 loop region when we knocked down *lin-41* in the wild type GFP::MEX-3 strain (Fig. 2d,  
493 2h, Table S4). We observed similar results when we knocked down *lin-41* in the *mex-3*  
494 3'UTR reporter strain (Fig. S1, Table S7), suggesting that LIN-41 represses *mex-3* in  
495 the loop region through its 3'UTR. This is also consistent with a study that showed *mex-*  
496 *3* mRNA associates with purified recombinant LIN-41 in an *in vitro* pull-down assay  
497 (Tsukamoto et al., 2017). Additionally, the 3'UTR deletion in the *mex-3(spr7)* mutant  
498 animals removes one putative LIN-41 binding motif while the 3'UTR deletion in the *mex-*  
499 *3(spr10)* mutant animals removes the other putative LIN-41 binding motif (Fig. 4a). The  
500 *mex-3(spr10)* mutant animals showed de-repression of MEX-3 in the loop region while  
501 *mex-3(spr7)* mutant animals did not, suggesting that the motif deleted in the *spr10* allele  
502 is partially sufficient to repress *mex-3* in the loop region (Fig. S2, Fig. 4d, 4e).  
503 Interestingly, *mex-3(spr9)* mutant animals which delete both putative binding motifs  
504 showed strong de-repression of MEX-3 in the loop region (Fig. 4b, 4c). This observation  
505 suggests that both motifs may be required for complete repression of MEX-3 in the loop  
506 region. Alternatively, given that the deletion in the *mex-3(spr9)* mutant animals deletes  
507 most of the 3'UTR, it could also be that there are additional RBPs that mediate  
508 repression of MEX-3 through its 3'UTR in that region. Together, our findings show that

509 the 3'UTR of *mex-3* is required for repression of MEX-3 in the loop region (Fig. 6a), and  
510 that one of two LIN-41 motifs is sufficient to partially repress MEX-3 expression in this  
511 region.

512

### 513 **OMA-1/2-mediated repression of endogenous MEX-3 expression in the oocytes**

514 OMA-1/2 are expressed in the oocytes and their levels gradually increase as the  
515 oocyte approaches maturation near the spermatheca (Detwiler, Reuben, Li, Rogers, &  
516 Lin, 2001). As a result of the *oma-1/2* RNAi, the germline contained large defective  
517 oocytes that failed to complete maturation. Knockdown of *oma-1/2* resulted in increased  
518 GFP::MEX-3 expression in these oocytes (Fig. 2e, 2i, Table S4), confirming previous  
519 findings (Tsukamoto et al., 2017). Similarly, these results were also observed in the  
520 transgenic *mex-3* 3'UTR reporter strain (Fig. S1, Table S7). Therefore, OMA-1/2 appear  
521 to repress *mex-3* expression in the oocytes through the 3'UTR. Consistently, *mex-3*  
522 mRNA was found to associate with purified OMA-1 protein *in vitro* (Tsukamoto et al.,  
523 2017). The 3'UTR of *mex-3* contains clusters of OMA binding motifs UA(A/U). We  
524 previously demonstrated that OMA-1/2 bind to such motifs with a high degree of  
525 cooperativity (Kaymak & Ryder, 2013). Only *mex-3(spr9)* mutant animals showed  
526 increased GFP::MEX-3 expression in the oogenic region (Fig. 4b, 4c, Table S6). The  
527 3'UTR region deleted in the *spr9* allele contains numerous UA(A/U) motifs (Fig. 4a).  
528 MEX-3 de-repression in the oocytes in the *mex-3(spr9)* mutant animals indicates that  
529 there are regions in the 3'UTR with high affinity to OMA-1/2.

530 Intriguingly, knockdown of *oma-1/2* caused a significant increase in the amount of  
531 GFP::MEX-3 in the oocyte nuclei. This suggests that OMA-1/2 plays a role, directly or



532 indirectly, in MEX-3 partitioning between the nucleus and the cytoplasm in oogenesis. It  
533 remains unknown what role MEX-3 plays in the nucleus, if any, or if it actively shuttles  
534 between the two compartments.

535 Together, our candidate RBP RNAi results demonstrate that *mex-3* mRNA is  
536 post-transcriptionally regulated through its 3'UTR by different RNA-binding proteins  
537 throughout the germline (Fig. 6a). GLD-1 represses *mex-3* in the meiotic region. LIN-41  
538 represses *mex-3* in the loop region and OMA-1/2 repress *mex-3* in the oocytes. Though  
539 not 3'UTR mediated, DAZ-1 represses *mex-3* in the distal mitotic end. Additionally, the  
540 largest 3'UTR deletion results in complete de-repression of MEX-3 expression  
541 throughout the germline including the mitotic end, meiotic region, loop region, and early  
542 oocytes. The expression patterns observed in the different mutants suggest that multiple  
543 RBP binding events contribute to complete repression in different regions of the  
544 germline.

545

#### 546 **Polyadenylation and deadenylation play a role in regulating MEX-3 expression in** 547 **the germline**

548 Our results indicate that cytoplasmic polyadenylation contributes to the positive  
549 regulation of *mex-3* in the mitotic region and the oocytes. However, we do not yet know  
550 which RNA-binding partner is utilized by GLD-2 to bind and polyadenylate *mex-3*  
551 transcripts in the oocytes. We observed increased GFP::MEX-3 expression in all the  
552 stacked oocytes when we knocked down *gld-3* (Fig. 3c, 3h, Table S5). It is possible that  
553 all of these oocytes are all mature and that the stacking caused MEX-3 to condense. It  
554 is also possible that GFP::MEX-3 expression increased in the oocytes independent of

555 the stacking and that this phenotype is an indirect result of *gld-3* knockdown. Since the  
556 binding specificity of GLD-3 is unknown, we do not know if the 3'UTR of *mex-3* contains  
557 any binding motifs for GLD-3. Our results show that polyadenylation contributes to the  
558 positive regulation of MEX-3 in the distal mitotic end and the oocytes (Fig. 6a). Our  
559 results also suggest a role for deadenylation in repressing *mex-3* in the meiotic region  
560 and mediating wild type expression of MEX-3 in the distal mitotic end. CCF-1 and NTL-  
561 1, but not CCR-4 appear to be essential components of this activity. These results  
562 support and expand upon a model where LIN-41 and OMA-1/2 repress their target  
563 mRNAs through the CCR4/NOT deadenylation complex during oocyte maturation  
564 (Tsukamoto et al., 2017).

565

566 **The translation initiation factor IFE-3 contributes to regulation of MEX-3**  
567 **expression in the germline**

568 Our results suggest that the translation initiation factor IFE-3 mediates *mex-3*  
569 repression in the germline. A previous study showed that IFE-3 confers a repressive  
570 effect mediated by its protein binding partners (Huggins et al., 2020). IFE-3 could form  
571 granules containing *mex-3* mRNA to inhibit its translation. In the meiotic region, IFE-3  
572 may directly interact with *mex-3* transcripts to inhibit translation initiation. Alternatively,  
573 this interaction may be bridged by GLD-1, knockdown of which phenocopies loss of IFE-  
574 3 in the meiotic region. However, it has been shown by others that the translational  
575 efficiency of *gld-1* is reduced after *ife-3* knockdown ((Huggins et al., 2020), suggesting a  
576 third possibility that IFE-3 may indirectly repress *mex-3* by positively regulating a  
577 negative *mex-3* regulatory RBP. It will be interesting to further explore how exactly these

578 mechanisms contribute to translational control of *mex-3* and other maternal mRNAs in  
579 the germline.

580

581 **An integrated model for coordination of MEX-3 expression and its contribution to**  
582 **fecundity**

583 Our findings demonstrate that the 3'UTR of *mex-3* controls the unique  
584 spatiotemporal expression pattern of MEX-3 in the germline (Fig. 6a) and contributes to  
585 germline development and fecundity. Surprisingly, deleting the majority of the 3'UTR  
586 does not cause complete sterility but instead leads to reduced fecundity. This finding is  
587 reminiscent of several miRNA family mutations that are not essential under standard  
588 growth conditions, but are required during stressful conditions such as aging, exposure  
589 to pathogens, or growth at elevated temperatures (Brenner, Jasiewicz, Fahley, Kemp, &  
590 Abbott, 2010). For example, strong *let-7* loss of function mutant animals have a reduced  
591 lifespan when exposed to the pathogen *Pseudomonas aeruginosa* (Ren & Ambros,  
592 2015). The 3'UTR of *mex-3* could act similarly to promote reproductive robustness  
593 under stressful growth conditions.

594 It remains unclear how overexpression of MEX-3 causes reduced fecundity.  
595 Increased MEX-3 concentration in the germline could lead to greater occupancy of sub-  
596 optimal MEX-3 binding motifs on both existing and new target transcripts. This may  
597 cause dysregulation of expression of those genes in the germline, reducing but not  
598 eliminating gamete production. It is also possible that fractions of MEX-3 could be  
599 sequestered into inactive granules, repressed through interactions with other proteins,  
600 or repressed through post-translational modifications. Consistent with this, some *mex-*

601 3(*spr10*) mutant animals showed MEX-3 accumulation in granules in the defective  
602 oocytes (Fig. 5b). It will be interesting to investigate such post-translational regulatory  
603 mechanisms and how they play a role in controlling levels of MEX-3. And whether those  
604 mechanisms are redundant with 3'UTR-mediated regulation.

605 In the early embryo, MEX-3 localizes to both the anterior and posterior  
606 blastomeres. However, MEX-3 is only active in the anterior blastomere due to  
607 degradation of MEX-3 in the posterior blastomere. In the anterior, the RBPs MEX-5/6  
608 are thought to bind and protect MEX-3. The degradation in the posterior blastomere is  
609 mediated by the RBP SPN-4 and the kinase protein PAR-4 (Huang & Hunter, 2015).  
610 SPN-4 is only expressed in late oocytes and the early embryo (Mootz et al., 2004;  
611 Ogura, Kishimoto, Mitani, Gengyo-Ando, & Kohara, 2003; Tsukamoto et al., 2017), but  
612 PAR-4 is expressed throughout the germline and in the early embryo (Watts, Morton,  
613 Bestman, & Kemphues, 2000). Therefore, PAR-4 could potentially mediate degradation  
614 of fractions of MEX-3 in the germline. Both post-transcriptional as well as post-  
615 translational regulatory mechanisms may contribute to MEX-3 expression pattern in the  
616 germline. However, we note that the 3'UTR is sufficient to pattern the expression of a  
617 reporter gene, so post-translational regulation through directed MEX-3 turnover may  
618 enforce the pattern of expression but is not absolutely required.

619 It will be intriguing to assess whether the endogenous 3'UTRs of other germline  
620 RBPs are equally dispensable for fertility. The majority of studies investigating germline  
621 RBPs function in *C. elegans* have relied on transgenic reporter strains (Elewa et al.,  
622 2015; Farley et al., 2008; Farley & Ryder, 2012; Hubstenberger, Cameron, Shtofman,  
623 Gutman, & Evans, 2012; Jeong, Verheyden, & Kimble, 2011; Merritt, Rasoloson, Ko, &

624 Seydoux, 2008; Pagano et al., 2009). By targeting the endogenous 3'UTRs using  
625 CRISPR/Cas9, we can assess the importance of the UTR elements to biological  
626 function. This approach can also be applied in other organisms where key proteins  
627 exhibit unique spatial expression patterns to control early developmental processes.

628

## 629 **Materials and Methods**

### 630 **Worm maintenance**

631 All strains used were maintained by growing the animals on *E. coli* OP50 seeded NGM  
632 plates. N2 wild type strain was used as a control in all the brood size experiments. Each  
633 isolated mutant was outcrossed at least three times before analysis. Genotypes of all  
634 the strains in this paper are in table S1.

635

### 636 **RNAi**

637 RNAi was performed by soaking animals in double-stranded RNA corresponding to the  
638 genomic cDNA sequence of the gene of interest. RNA was isolated from wild type N2  
639 animals using trizol and phenol-chloroform extraction followed by RT-PCR using  
640 Superscript III One Step RT-PCR system with Platinum Taq DNA polymerase kit  
641 (ThermoFisher Scientific cat #: 12574026) to prepare the cDNA, which was used to  
642 amplify the template DNA used in the in vitro transcription (IVT) reaction to transcribe  
643 the dsRNA. Ambion MEGAscript T7 in vitro transcription kit (ThermoFisher Scientific cat  
644 #: AM1333) was used to prepare the dsRNA following the manufacturer's protocol. The  
645 dsRNA was purified by phenol-chloroform extraction and isopropanol precipitation. The  
646 sequences of the oligos that were used to amplify the cDNA used as a template in the

647 IVT reactions are in table S2. For the RNAi soaks, each tube contained 2 $\mu$ l of 5x  
648 soaking buffer, and 8 $\mu$ l of 500-1000ng/ $\mu$ l purified dsRNA. 0.5 $\mu$ l of M9 buffer containing  
649 arrested L1 animals was added to each individual tube. In the *lin-41* RNAi, L4 animals  
650 were placed in the dsRNA instead of L1s. The control tube contained 2 $\mu$ l of soaking  
651 buffer and 8 $\mu$ l of nuclease-free water. The soaked animals were incubated at 20°C or  
652 25°C for 24 hours in the thermocycler. 20°C incubation temperature was used for the  
653 DG4269 ((tn1753[gfp::3xflag::mex-3]) strain while the 25°C temperature was used for  
654 the WRM24 (*sprSi17 [mex-5p::MODC PEST::GFP::H2B::mex-3 3'UTR + Cbr-unc-*  
655 *119(+)] II*) strain. After 24 hours, animals were placed on NGM plates seeded with *E.*  
656 *coli* OP50 and placed in the incubator. Once the animals reached adulthood, they were  
657 mounted on a 2% agarose pad on microscope slides, treated with 1mM levamisole to  
658 paralyze the animals, covered with a cover glass, then imaged.

659

## 660 **CRISPR/Cas9 mutagenesis**

661 Ribonucleoprotein (RNP) mixes consisted of recombinant purified *SpCas9* (final conc. =  
662 2  $\mu$ M), chemically synthesized crRNAs (final conc. = 40ng/ $\mu$ l) and tracrRNA (final conc.  
663 = 40ng/ $\mu$ l), commercial duplex buffer (30 mM HEPES, pH 7.5; 100 mM potassium  
664 acetate), and nuclease-free water. Sequences for the guide RNAs used are in table S3.  
665 *SpCas9* was expressed from pET28a-Cas9-His (Addgene plasmid number 98158) and  
666 purified in our lab. The RNP mix was incubated at 37°C for 10 min. After the incubation,  
667 the plasmid pRF4 (*rol-6*) was added as a co-injection marker (final conc. = 50ng/ $\mu$ l). The  
668 mix was centrifuged at maximum speed for 5 min prior to loading a pulled borosilicate  
669 glass capillary injection needle. Young adult animals were microinjected in their gonads

670 with the injection mix and then allowed to recover in M9 buffer on *E. coli* OP50 seeded  
671 NGM plates. The progeny of the injected animals was screened for the presence of  
672 roller animals, indicating a successful injection. All roller animals were singled out onto  
673 individual NGM plates, allowed to lay eggs, then lysed in a lysis buffer (30 mM Tris  
674 pH=8, 8 mM EDTA, 100 mM NaCl, 0.7% NP-40, 0.7% Tween-20 + proteinase K just  
675 prior to use). Lysates were frozen at -80°C for at least 10 min, then incubated at 65°C  
676 for 1 hour and 95°C for 15 min prior to genotyping PCR. For a 25µl PCR reaction, 2µl of  
677 the lysate was used as a template. The primers used to detect *mex-3* 3'UTR deletions  
678 were (forward primer: 5'-GGCGGAAACATGAATCTGAGCCC- 3', reverse primer: 5'-  
679 CGGACAATTGATCGGCCAATTGAC-3'). PCR reactions were run on a 1.5% TAE  
680 agarose gel. Single bands that are shorter than the wild type band indicate a  
681 homozygous mutation while two bands including the wild type band indicate a  
682 heterozygous mutation. Sanger sequencing of the purified PCR product was used to  
683 define the identity of the specific deletion.

684

#### 685 **Poly(A) tail assay and TOPO cloning**

686 N2, DG4269, and all *mex-3* mutant animals were collected and washed in M9 buffer  
687 then frozen in trizol and stored at -80°C. Total RNA was isolated from these animals  
688 using phenol-chloroform and isopropanol extraction. For the poly(A) tail assay, a poly(A)  
689 tail assay kit (ThermoFisher Scientific cat #: 764551KT) was used following the  
690 protocol outlined by the manufacturer. For the tail-specific primer set, a universal  
691 reverse primer provided in the kit was used for all the strains. For N2, DG4269,  
692 *mex-3(spr5)*, *mex-3(spr6)*, and *mex-3(spr10)*, the forward primer 5'-

693 CTACGCACA ACTAACGGAGA-3' was used. For *mex-3(spr9)*, the forward primer  
694 5'-TCATGTCCTCCCTCAAAGG-3' was used and for *mex-3(spr7)*, the forward  
695 primer 5'-CCCCAATATATATTCCTACAGTAGG-3' was used. The PCR products  
696 were purified using a Zymo Research DNA clean and concentrator kit (cat #:  
697 D4034). The PCR products were cloned into a pCR™4-TOPO® TA vector using a  
698 TOPO TA Cloning kit (ThermoFisher Scientific cat #: K4575J10) following the  
699 manufacturer's protocol. Plasmids containing the insert were analyzed using  
700 Sanger sequencing.

701

## 702 **Fluorescence microscopy**

703 All of the imaging was done using a Zeiss Axioskop 2 plus microscope. ImageJ version  
704 1.49 was used to quantify the images of the fluorescent animals from the RNAi  
705 experiments in the DG4269, WRM24, and the *mex-3* 3'UTR deletion mutant strains. For  
706 each animal, a line (width = 30 pixels) was drawn starting from the distal tip of the  
707 germline spanning the entire germline to the last oocyte. The fluorescence intensity was  
708 measured for each pixel in the line and then binned (total number = 20 bins for the  
709 DG4269 animals, 10 bins for the WRM24 animals). The fluorescence intensity from  
710 each animal was averaged across each bin. GraphPad Prism 7.04 was used to graph  
711 the mean fluorescence intensity for all the animals.

712

## 713 **Brood size**

714 For each biological replicate, ~25 individual L3/L4 animals were placed on individual  
715 NGM plates seeded with *E. coli* OP50. Each animal was moved to a fresh plate after



716 two days initially, and then moved again daily until the completion of the experiment.  
717 The number of eggs and larvae on the plate, from which the animal was moved, was  
718 counted 1-2 days later. The number of progeny is the total number of eggs and larvae  
719 produced during the animal's fertile period. All animals were grown and counted at  
720 20°C. N2 wild type animals were used as the control. Each assay consisted of three  
721 biological replicates.

722

### 723 **Sterility assay**

724 On day 1 for each strain, adult animals were bleached using 20% alkaline hypochlorite  
725 solution (final conc. 20% commercial bleach, 250 mM NaOH), washed 2x with M9 buffer  
726 and soaked in M9 buffer in a 1.7ml Eppendorf tube overnight. On day 2, the animals  
727 were placed on *E. coli* OP50 seeded NGM plates and incubated at 25°C. On day 3,  
728 animals were singled out onto individual plates and kept in the 25°C incubator. On day  
729 5, each plate was scored for fertility or sterility based on the presence of viable progeny  
730 on the plate. Animals that did not have any viable progeny on the plate were scored as  
731 sterile.

732

### 733 **Data analysis**

734 In the imaging studies, a two tailed student t-test was used to compare the mean  
735 fluorescence intensities. For RNAi conditions that were compared to the same control  
736 data, an unstacked one-way ANOVA was used to assess the overall significance. Post-  
737 hoc pairwise p-values were calculated using the Fisher's LSD test then corrected for  
738 multiple hypotheses using a Bonferroni adjustment by multiplying the p-values by the

739 number of hypotheses tested. To analyze the nuclear fluorescence intensity in the *oma-*  
740 *1/2* RNAi animals and controls, a circle with a radius of 15 pixels was drawn in the  
741 nucleus and another circle of the same radius drawn in the cytoplasm of the same  
742 oocyte. We calculated the ratio by dividing the nuclear fluorescence intensity by the  
743 cytoplasmic fluorescence intensity. We calculated the ratios for the two most proximal  
744 oocytes and then averaged the two ratios for each individual animal. A two-tailed  
745 student t-test was used to compare the ratios of the control and treated animals. Brood  
746 size data were analyzed using both Mann-Whitney U test and Kolmogorov-Smirnov  
747 nonparametric tests to compare the distributions between mutant and control strains.  
748 The data presented in each brood size assay represent a global analysis from three  
749 independent biological replicates. The p-values reported in figure 4 and supplemental  
750 figure 2 are from the Kolmogorov-Smirnov test.

751

## 752 **Acknowledgements**

753 We thank all members of the Ryder lab for helpful discussions and reading of the  
754 manuscript. We also thank Dr. Victor Ambros for critical reading of the manuscript. This  
755 work is funded by an R01 NIH grant (5R01GM117237) to S.P.R.. The DG4269 strain  
756 was provided by the Caenorhabditis Genetics Center (CGC) which is funded by NIH  
757 Office of Research Infrastructure Programs (P40 OD010440).

758

## 759 **Author Contributions**

760 M.A. performed all the experiments and analyses. M.A. and S.P.R. wrote and edited the  
761 manuscript.

762

## 763 **Competing interests**

764 The authors declare no competing interests.

765

766

## 767 References

768

769 Aeschimann, F., Kumari, P., Bartake, H., Gaidatzis, D., Xu, L., Ciosk, R., & Grosshans, H. (2017). LIN41  
770 Post-transcriptionally Silences mRNAs by Two Distinct and Position-Dependent Mechanisms.  
771 *Mol Cell*, 65(3), 476-489 e474. doi:10.1016/j.molcel.2016.12.010

772 Bashirullah, A., Halsell, S. R., Cooperstock, R. L., Kloc, M., Karaiskakis, A., Fisher, W. W., . . . Lipshitz, H. D.  
773 (1999). Joint action of two RNA degradation pathways controls the timing of maternal transcript  
774 elimination at the midblastula transition in *Drosophila melanogaster*. *EMBO J*, 18(9), 2610-2620.  
775 doi:10.1093/emboj/18.9.2610

776 Brenner, J. L., Jasiewicz, K. L., Fahley, A. F., Kemp, B. J., & Abbott, A. L. (2010). Loss of individual  
777 microRNAs causes mutant phenotypes in sensitized genetic backgrounds in *C. elegans*. *Curr Biol*,  
778 20(14), 1321-1325. doi:10.1016/j.cub.2010.05.062

779 Buchet-Poyau, K., Courchet, J., Le Hir, H., Seraphin, B., Scoazec, J. Y., Duret, L., . . . Billaud, M. (2007).  
780 Identification and characterization of human Mex-3 proteins, a novel family of evolutionarily  
781 conserved RNA-binding proteins differentially localized to processing bodies. *Nucleic Acids Res*,  
782 35(4), 1289-1300. doi:10.1093/nar/gkm016

783 Ciosk, R., DePalma, M., & Priess, J. R. (2006). Translational regulators maintain totipotency in the  
784 *Caenorhabditis elegans* germline. *Science*, 311(5762), 851-853. doi:10.1126/science.1122491

785 Collier, J., & Parker, R. (2004). Eukaryotic mRNA decapping. *Annu Rev Biochem*, 73, 861-890.  
786 doi:10.1146/annurev.biochem.73.011303.074032

787 Detwiler, M. R., Reuben, M., Li, X., Rogers, E., & Lin, R. (2001). Two zinc finger proteins, OMA-1 and  
788 OMA-2, are redundantly required for oocyte maturation in *C. elegans*. *Dev Cell*, 1(2), 187-199.  
789 Retrieved from <https://www.ncbi.nlm.nih.gov/pubmed/11702779>

790 Di Giammartino, D. C., Nishida, K., & Manley, J. L. (2011). Mechanisms and consequences of alternative  
791 polyadenylation. *Mol Cell*, 43(6), 853-866. doi:10.1016/j.molcel.2011.08.017

792 Draper, B. W., Mello, C. C., Bowerman, B., Hardin, J., & Priess, J. R. (1996). MEX-3 is a KH domain protein  
793 that regulates blastomere identity in early *C. elegans* embryos. *Cell*, 87(2), 205-216.  
794 doi:10.1016/s0092-8674(00)81339-2

795 Eckmann, C. R., Crittenden, S. L., Suh, N., & Kimble, J. (2004). GLD-3 and control of the mitosis/meiosis  
796 decision in the germline of *Caenorhabditis elegans*. *Genetics*, 168(1), 147-160.  
797 doi:10.1534/genetics.104.029264

798 Eckmann, C. R., Kraemer, B., Wickens, M., & Kimble, J. (2002). GLD-3, a bicaudal-C homolog that inhibits  
799 FBF to control germline sex determination in *C. elegans*. *Dev Cell*, 3(5), 697-710.  
800 doi:10.1016/s1534-5807(02)00322-2

801 Elewa, A., Shirayama, M., Kaymak, E., Harrison, P. F., Powell, D. R., Du, Z., . . . Mello, C. C. (2015). POS-1  
802 Promotes Endo-mesoderm Development by Inhibiting the Cytoplasmic Polyadenylation of neg-1  
803 mRNA. *Dev Cell*, 34(1), 108-118. doi:10.1016/j.devcel.2015.05.024

804 Farley, B. M., Pagano, J. M., & Ryder, S. P. (2008). RNA target specificity of the embryonic cell fate  
805 determinant POS-1. *RNA*, 14(12), 2685-2697. doi:10.1261/rna.1256708

806 Farley, B. M., & Ryder, S. P. (2012). POS-1 and GLD-1 repress glp-1 translation through a conserved  
807 binding-site cluster. *Mol Biol Cell*, 23(23), 4473-4483. doi:10.1091/mbc.E12-03-0216

808 Guven-Ozkan, T., Robertson, S. M., Nishi, Y., & Lin, R. (2010). zif-1 translational repression defines a  
809 second, mutually exclusive OMA function in germline transcriptional repression. *Development*,  
810 137(20), 3373-3382. doi:10.1242/dev.055327

- 811 Huang, N. N., & Hunter, C. P. (2015). The RNA binding protein MEX-3 retains asymmetric activity in the  
812 early *Caenorhabditis elegans* embryo in the absence of asymmetric protein localization. *Gene*,  
813 554(2), 160-173. doi:10.1016/j.gene.2014.10.042
- 814 Huang, N. N., Mootz, D. E., Walhout, A. J., Vidal, M., & Hunter, C. P. (2002). MEX-3 interacting proteins  
815 link cell polarity to asymmetric gene expression in *Caenorhabditis elegans*. *Development*, 129(3),  
816 747-759. Retrieved from <https://www.ncbi.nlm.nih.gov/pubmed/11830574>
- 817 Hubbard, E. J., & Greenstein, D. (2005). Introduction to the germ line. *WormBook*, 1-4.  
818 doi:10.1895/wormbook.1.18.1
- 819 Hubstenberger, A., Cameron, C., Shtofman, R., Gutman, S., & Evans, T. C. (2012). A network of PUF  
820 proteins and Ras signaling promote mRNA repression and oogenesis in *C. elegans*. *Dev Biol*,  
821 366(2), 218-231. doi:10.1016/j.ydbio.2012.03.019
- 822 Huggins, H. P., Subash, J. S., Stoffel, H., Henderson, M. A., Hoffman, J. L., Buckner, D. S., . . . Keiper, B. D.  
823 (2020). Distinct roles of two eIF4E isoforms in the germline of *Caenorhabditis elegans*. *J Cell Sci*,  
824 133(6). doi:10.1242/jcs.237990
- 825 Jeong, J., Verheyden, J. M., & Kimble, J. (2011). Cyclin E and Cdk2 control GLD-1, the mitosis/meiosis  
826 decision, and germline stem cells in *Caenorhabditis elegans*. *PLoS Genet*, 7(3), e1001348.  
827 doi:10.1371/journal.pgen.1001348
- 828 Jiang, H., Zhang, X., Luo, J., Dong, C., Xue, J., Wei, W., . . . Yang, C. (2012). Knockdown of hMex-3A by  
829 small RNA interference suppresses cell proliferation and migration in human gastric cancer cells.  
830 *Mol Med Rep*, 6(3), 575-580. doi:10.3892/mmr.2012.943
- 831 Karashima, T., Sugimoto, A., & Yamamoto, M. (2000). *Caenorhabditis elegans* homologue of the human  
832 azoospermia factor DAZ is required for oogenesis but not for spermatogenesis. *Development*,  
833 127(5), 1069-1079. Retrieved from <https://www.ncbi.nlm.nih.gov/pubmed/10662646>
- 834 Kaymak, E., Farley, B. M., Hay, S. A., Li, C., Ho, S., Hartman, D. J., & Ryder, S. P. (2016). Efficient  
835 generation of transgenic reporter strains and analysis of expression patterns in *Caenorhabditis*  
836 *elegans* using library MosSCI. *Dev Dyn*, 245(9), 925-936. doi:10.1002/dvdy.24426
- 837 Kaymak, E., & Ryder, S. P. (2013). RNA recognition by the *Caenorhabditis elegans* oocyte maturation  
838 determinant OMA-1. *J Biol Chem*, 288(42), 30463-30472. doi:10.1074/jbc.M113.496547
- 839 Keiper, B. D., Lamphear, B. J., Deshpande, A. M., Jankowska-Anyszka, M., Aamodt, E. J., Blumenthal, T.,  
840 & Rhoads, R. E. (2000). Functional characterization of five eIF4E isoforms in *Caenorhabditis*  
841 *elegans*. *J Biol Chem*, 275(14), 10590-10596. doi:10.1074/jbc.275.14.10590
- 842 Lee, M. H., & Schedl, T. (2004). Translation repression by GLD-1 protects its mRNA targets from  
843 nonsense-mediated mRNA decay in *C. elegans*. *Genes Dev*, 18(9), 1047-1059.  
844 doi:10.1101/gad.1188404
- 845 Lee, M. H., & Schedl, T. (2006). RNA-binding proteins. *WormBook*, 1-13. doi:10.1895/wormbook.1.79.1
- 846 Lima, S. A., Chipman, L. B., Nicholson, A. L., Chen, Y. H., Yee, B. A., Yeo, G. W., . . . Pasquinelli, A. E.  
847 (2017). Short poly(A) tails are a conserved feature of highly expressed genes. *Nat Struct Mol*  
848 *Biol*, 24(12), 1057-1063. doi:10.1038/nsmb.3499
- 849 Lin, R. (2003). A gain-of-function mutation in *oma-1*, a *C. elegans* gene required for oocyte maturation,  
850 results in delayed degradation of maternal proteins and embryonic lethality. *Dev Biol*, 258(1),  
851 226-239. doi:10.1016/s0012-1606(03)00119-2
- 852 Marin, V. A., & Evans, T. C. (2003). Translational repression of a *C. elegans* Notch mRNA by the STAR/KH  
853 domain protein GLD-1. *Development*, 130(12), 2623-2632. doi:10.1242/dev.00486
- 854 Merritt, C., Rasoloson, D., Ko, D., & Seydoux, G. (2008). 3' UTRs are the primary regulators of gene  
855 expression in the *C. elegans* germline. *Curr Biol*, 18(19), 1476-1482.  
856 doi:10.1016/j.cub.2008.08.013

- 857 Molin, L., & Puisieux, A. (2005). *C. elegans* homologue of the Caf1 gene, which encodes a subunit of the  
858 CCR4-NOT complex, is essential for embryonic and larval development and for meiotic  
859 progression. *Gene*, 358, 73-81. doi:10.1016/j.gene.2005.05.023
- 860 Mootz, D., Ho, D. M., & Hunter, C. P. (2004). The STAR/Maxi-KH domain protein GLD-1 mediates a  
861 developmental switch in the translational control of *C. elegans* PAL-1. *Development*, 131(14),  
862 3263-3272. doi:10.1242/dev.01196
- 863 Naef, V., De Sarlo, M., Testa, G., Corsinovi, D., Azzarelli, R., Borello, U., & Ori, M. (2020). The Stemness  
864 Gene Mex3A Is a Key Regulator of Neuroblast Proliferation During Neurogenesis. *Front Cell Dev  
865 Biol*, 8, 549533. doi:10.3389/fcell.2020.549533
- 866 Nusch, M., Yeroslaviz, A., Habermann, B., & Eckmann, C. R. (2014). The cytoplasmic poly(A)  
867 polymerases GLD-2 and GLD-4 promote general gene expression via distinct mechanisms.  
868 *Nucleic Acids Res*, 42(18), 11622-11633. doi:10.1093/nar/gku838
- 869 Ogura, K., Kishimoto, N., Mitani, S., Gengyo-Ando, K., & Kohara, Y. (2003). Translational control of  
870 maternal glp-1 mRNA by POS-1 and its interacting protein SPN-4 in *Caenorhabditis elegans*.  
871 *Development*, 130(11), 2495-2503. doi:10.1242/dev.00469
- 872 Pagano, J. M., Farley, B. M., Essien, K. I., & Ryder, S. P. (2009). RNA recognition by the embryonic cell  
873 fate determinant and germline totipotency factor MEX-3. *Proc Natl Acad Sci U S A*, 106(48),  
874 20252-20257. doi:10.1073/pnas.0907916106
- 875 Pereira, B., Le Borgne, M., Chartier, N. T., Billaud, M., & Almeida, R. (2013). MEX-3 proteins: recent  
876 insights on novel post-transcriptional regulators. *Trends Biochem Sci*, 38(10), 477-479.  
877 doi:10.1016/j.tibs.2013.08.004
- 878 Pereira, B., Sousa, S., Barros, R., Carreto, L., Oliveira, P., Oliveira, C., . . . Almeida, R. (2013). CDX2  
879 regulation by the RNA-binding protein MEX3A: impact on intestinal differentiation and  
880 stemness. *Nucleic Acids Res*, 41(7), 3986-3999. doi:10.1093/nar/gkt087
- 881 Ren, Z., & Ambros, V. R. (2015). *Caenorhabditis elegans* microRNAs of the let-7 family act in innate  
882 immune response circuits and confer robust developmental timing against pathogen stress. *Proc  
883 Natl Acad Sci U S A*, 112(18), E2366-2375. doi:10.1073/pnas.1422858112
- 884 Ryder, S. P., Frater, L. A., Abramovitz, D. L., Goodwin, E. B., & Williamson, J. R. (2004). RNA target  
885 specificity of the STAR/GSG domain post-transcriptional regulatory protein GLD-1. *Nat Struct  
886 Mol Biol*, 11(1), 20-28. doi:10.1038/nsmb706
- 887 Salles, F. J., Lieberfarb, M. E., Wreden, C., Gergen, J. P., & Strickland, S. (1994). Coordinate initiation of  
888 *Drosophila* development by regulated polyadenylation of maternal messenger RNAs. *Science*,  
889 266(5193), 1996-1999. doi:10.1126/science.7801127
- 890 Shatkin, A. J., & Manley, J. L. (2000). The ends of the affair: capping and polyadenylation. *Nat Struct Biol*,  
891 7(10), 838-842. doi:10.1038/79583
- 892 Spike, C. A., Coetzee, D., Nishi, Y., Guven-Ozkan, T., Oldenbroek, M., Yamamoto, I., . . . Greenstein, D.  
893 (2014). Translational control of the oogenic program by components of OMA ribonucleoprotein  
894 particles in *Caenorhabditis elegans*. *Genetics*, 198(4), 1513-1533.  
895 doi:10.1534/genetics.114.168823
- 896 Strome, S., Garvin, C., Paulsen, J., Capowski, E., Martin, P., & Beanan, M. (1994). Specification and  
897 development of the germline in *Caenorhabditis elegans*. *Ciba Found Symp*, 182, 31-45;  
898 discussion 45-57. doi:10.1002/9780470514573.ch3
- 899 Suh, N., Crittenden, S. L., Goldstrohm, A., Hook, B., Thompson, B., Wickens, M., & Kimble, J. (2009). FBF  
900 and its dual control of glp-1 expression in the *Caenorhabditis elegans* germline. *Genetics*, 181(4),  
901 1249-1260. doi:10.1534/genetics.108.099440
- 902 Tamburino, A. M., Ryder, S. P., & Walhout, A. J. (2013). A compendium of *Caenorhabditis elegans* RNA  
903 binding proteins predicts extensive regulation at multiple levels. *G3 (Bethesda)*, 3(2), 297-304.  
904 doi:10.1534/g3.112.004390

905 Tao, Q., Yokota, C., Puck, H., Kofron, M., Birsoy, B., Yan, D., . . . Heasman, J. (2005). Maternal wnt11  
906 activates the canonical wnt signaling pathway required for axis formation in *Xenopus* embryos.  
907 *Cell*, *120*(6), 857-871. doi:10.1016/j.cell.2005.01.013

908 Tsukamoto, T., Gearhart, M. D., Spike, C. A., Huelgas-Morales, G., Mews, M., Boag, P. R., . . . Greenstein,  
909 D. (2017). LIN-41 and OMA Ribonucleoprotein Complexes Mediate a Translational Repression-  
910 to-Activation Switch Controlling Oocyte Meiotic Maturation and the Oocyte-to-Embryo  
911 Transition in *Caenorhabditis elegans*. *Genetics*, *206*(4), 2007-2039.  
912 doi:10.1534/genetics.117.203174

913 Watts, J. L., Morton, D. G., Bestman, J., & Kempfues, K. J. (2000). The *C. elegans* par-4 gene encodes a  
914 putative serine-threonine kinase required for establishing embryonic asymmetry. *Development*,  
915 *127*(7), 1467-1475. Retrieved from <https://www.ncbi.nlm.nih.gov/pubmed/10704392>

916 Wright, J. E., Gaidatzis, D., Senften, M., Farley, B. M., Westhof, E., Ryder, S. P., & Ciosk, R. (2011). A  
917 quantitative RNA code for mRNA target selection by the germline fate determinant GLD-1.  
918 *EMBO J*, *30*(3), 533-545. doi:10.1038/emboj.2010.334

919 Zhang, J., Houston, D. W., King, M. L., Payne, C., Wylie, C., & Heasman, J. (1998). The role of maternal  
920 VegT in establishing the primary germ layers in *Xenopus* embryos. *Cell*, *94*(4), 515-524.  
921 doi:10.1016/s0092-8674(00)81592-5

922 Zhang, Y., Park, S., Blaser, S., & Sheets, M. D. (2014). Determinants of RNA binding and translational  
923 repression by the Bicaudal-C regulatory protein. *J Biol Chem*, *289*(11), 7497-7504.  
924 doi:10.1074/jbc.M113.526426

925 Zhu, S. J., Hallows, S. E., Currie, K. W., Xu, C., & Pearson, B. J. (2015). A mex3 homolog is required for  
926 differentiation during planarian stem cell lineage development. *Elife*, *4*. doi:10.7554/eLife.07025

927  
928  
929  
930  
931  
932  
933  
934  
935  
936  
937  
938  
939  
940  
941  
942  
943  
944  
945  
946  
947  
948  
949
